# Supplementary material for: Role of m6A RNA Methylation in Thyroid Cancer Cell Lines
Source: MDPI journal article supplement (doi:10.3390/ijms231911516), 2022-09-29
Supplement: s1 [file s1]

Supplementary material

Supplementary Table

Table S1 : Primer sequences used in RT-qPCR

| Oligo name     | Sequence               |
|----------------|------------------------|
| ACTB Forward   | TTGTTACAGGAAGTCCCTTGCC |
| ACTB Reverse   | ATGCTATCACCTCCCCTGTGTG |
| METTL3 Forward | ACCATTCCAAGCTCTCTGCC   |
| METTL3 Reverse | AGTCGAGTCCTGTTCTGCAC   |
| DDI2 Forward   | GGATGGCGTGTACGTCAGAT   |
| DDI2 Reverse   | CCTGGCTGACCTGTTGTTCT   |

Supplementary Figure

Figure S1: Number of 8505C or SW1736 viable cells after treatments with negative control (nc) or with METTL3 specific siRNAs (siRNA 1 and siRNA 2). After staining with trypan blue, only viable cells were considered. n = 4. \*\*\* p < 0.001.
